# Supplementary material for: Endometriosis-targeted MRI imaging using bevacizumab-modified nanoparticles aimed at vascular endothelial growth factor
Source: Royal Society of Chemistry journal article supplement (doi:10.1039/d2na00787h), 2023-01-01
Supplement: d2na00787h1.pdf [file d2na00787h1.pdf]

**Endometriosis targeted MRI imaging using bevacizumab-modified nanoparticles  
aiming at vascular endothelial growth factor**

Qi Zhang M.D. Ph.D. \*, Shiman Wu M.D. Ph.D. \*, Yajie Li, BM, Mao Lai, BM, Qing

Li, Ph. D. , Caixia Fu, Ph. D. , Zhenwei Yao M.D. Ph.D.#, Junhai Zhang M.D. Ph.D.#

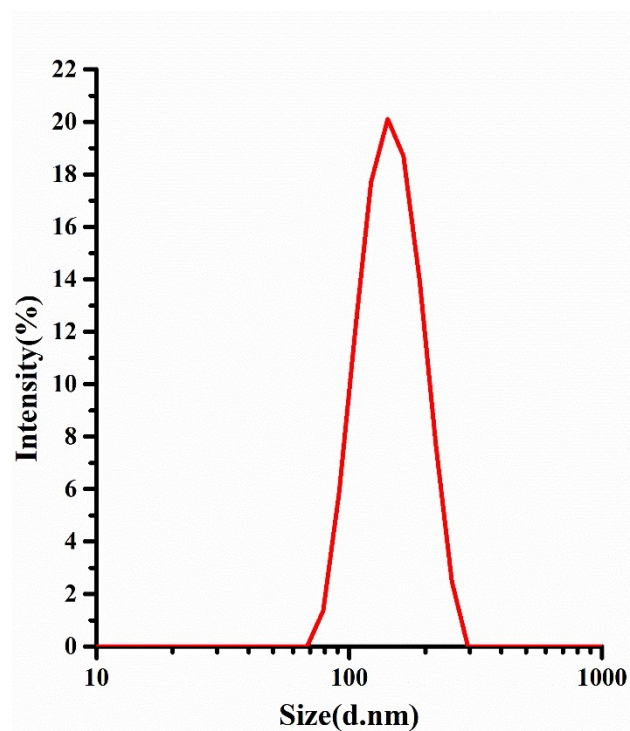

**Figure S1.** Dynamic light scattering (DLS) distribution curve of NaGdF<sub>4</sub>@PEG-cholesterol@bevacizumab-Cy5.5 nanoparticles (NPBCNs).

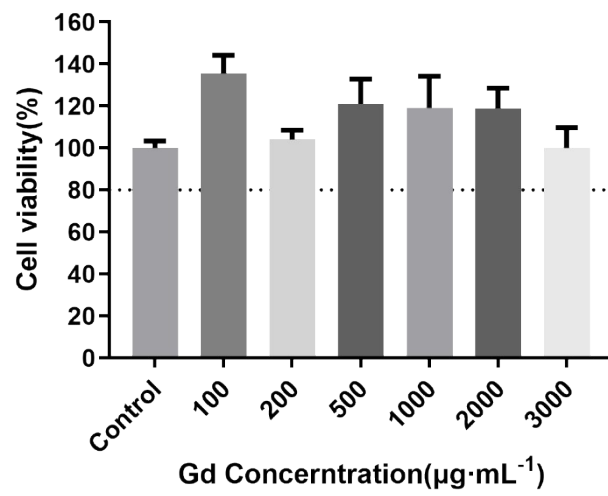

**Figure S2.** CCK8 assay of NaGdF<sub>4</sub>@PEG-cholesterol@bevacizumab-Cy5.5 nanoparticles on hEM15A cells

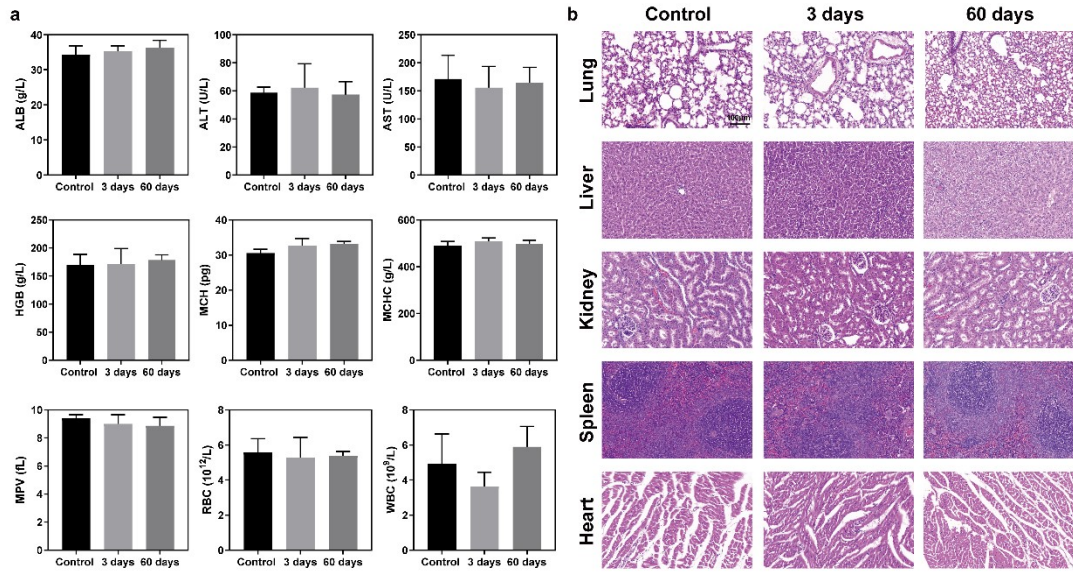

**Figure S3.** *In vivo* toxicity evaluation of NaGdF<sub>4</sub>@PEG-cholesterol@bevacizumab-Cy5.5 nanoparticles. a) Hematological indices and b) hematoxylin and eosin (H&E) staining of major organs of rat after injection of NaGdF<sub>4</sub>@PEG-cholesterol@bevacizumab-Cy5.5 nanoparticles for 3 days and 60 days.
